# Supplementary material for: Oxidation activity modulation of a single atom Ce-N-C nanozyme enabling a time-resolved sensor to detect Fe3+ and Cr6+
Source: Royal Society of Chemistry journal article supplement (doi:10.1039/d2tc02476d), 2022-01-01
Supplement: d2tc02476d1.pdf [file d2tc02476d1.pdf]

1  
2  
3  
4  
5  
6  
7  
8  
9  
10  
11  
12  
13  
14  
15  
16  
17

***Supporting Information for***

**Oxidation activity modulation of single atom Ce-N-C nanozyme enable  
time-resolved sensor to detect Fe<sup>3+</sup> and Cr<sup>6+</sup>**

Guangchun Song <sup>a‡</sup>, Qi Zhang <sup>a‡</sup>, Shuang Liang <sup>a</sup>, Yin Yao <sup>a</sup>, Menglin Feng <sup>a</sup>,

Zainabu Majid <sup>a</sup>, Xiaoyun He <sup>a</sup>, Kunlun Huang <sup>a,b</sup>, Jin-Cheng Li <sup>c</sup> and Nan Cheng <sup>a\*</sup>

*a. Beijing Laboratory for Food Quality and Safety, College of Food Science and  
Nutritional Engineering, China Agricultural University, Beijing 100083, China*

*b. Key Laboratory of Safety Assessment of Genetically Modified Organism (Food  
Safety), Ministry of Agriculture, Beijing 100083, China*

*c. Faculty of Chemical Engineering, Yunnan Provincial Key Laboratory of Energy  
Saving in Phosphorus, Chemical Engineering and New Phosphorus Materials,  
Kunming University of Science and Technology, Kunming 650000, China*

*‡ These authors contributed equally to this work.*

*\* Corresponding author*

*Email: chengnanFSNE@cau.edu.cn*

19 **1. Characteristic of SACe-N-C**

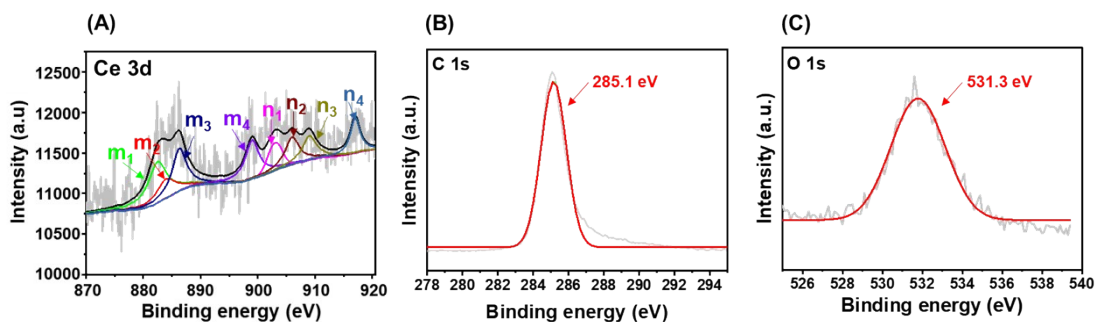

20

21

**Fig. S1** XPS (A)Ce 3d, (B)C 1s and (C)O 1s spectra of SACe-N-C.

22

23

24

25

26

27

Fig. S1A showed the XPS Ce 3d spectra of SACe-N-C nanozyme. Eight peaks were fitted according to their binding energies. Among them,  $n_2$  and  $m_2$  were ascribed to  $Ce^{3+}$  while the others were for  $Ce^{4+}$ . XPS C1s spectra showed that the C binding energy of SACe-N-C was 285.1 eV (Fig. S1B). At the same time, XPS O1s spectra showed that the O binding energy of SACe-N-C was 531.3 eV (Fig. S1C).

**2. Optimization and evaluation of experimental conditions**

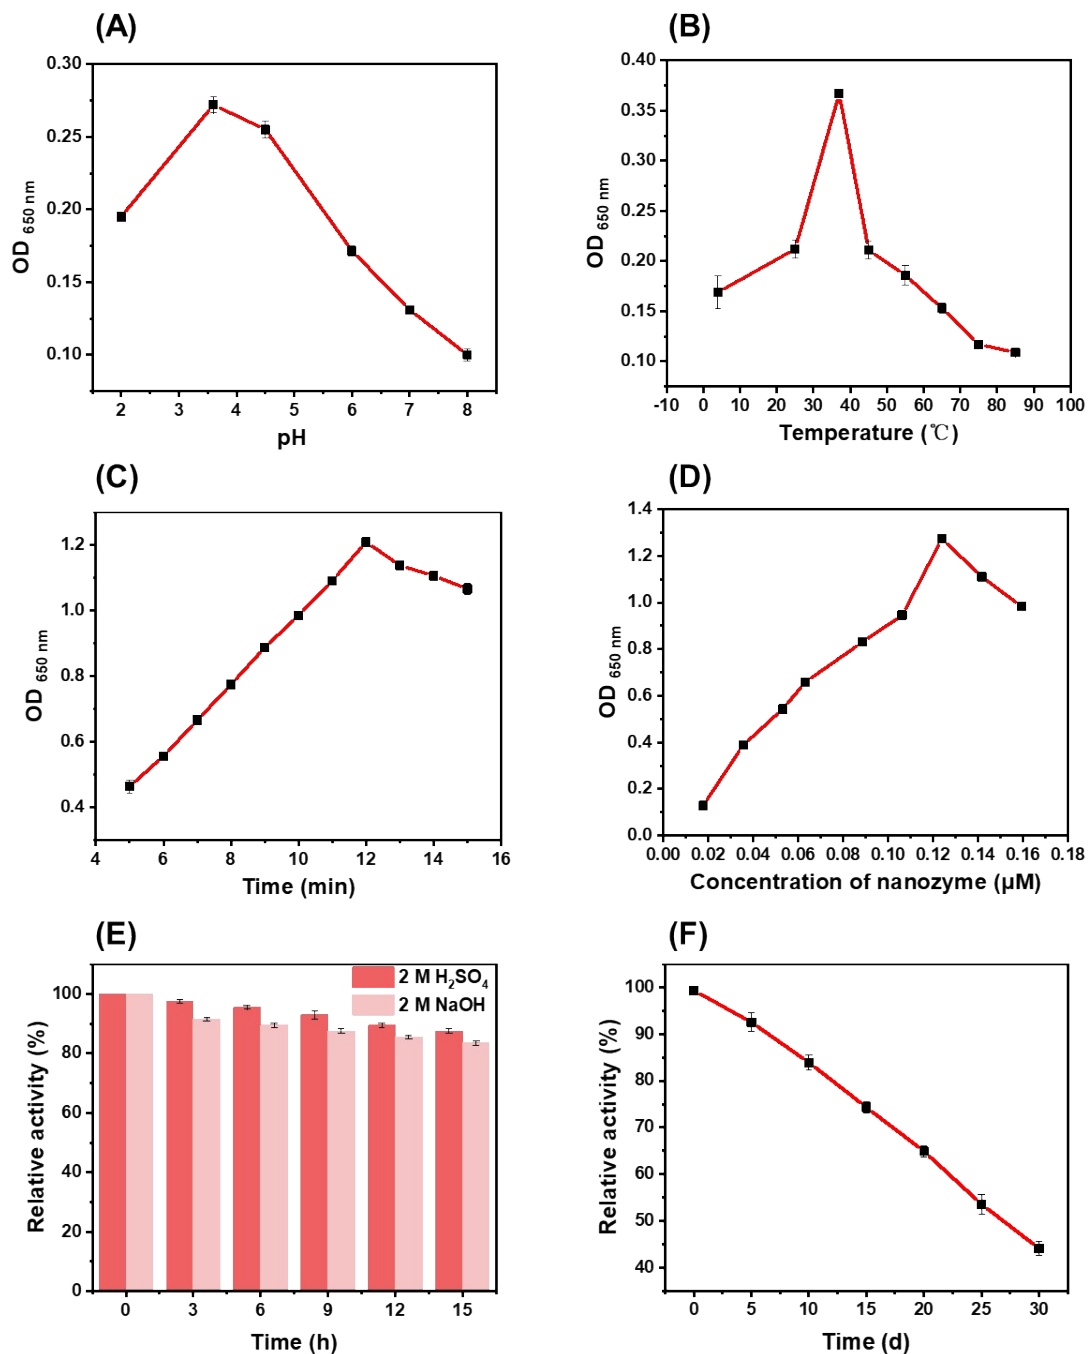

28

29 **Fig. S2** Optimization of reaction conditions for OXD-like activity of the SACe-N-C nanozyme: (A)  
 30 pH; (B) temperature; (C) Time; (D) the concentration of SACe-N-C nanozyme; (E) relative  
 31 activity at 2 M H<sub>2</sub>SO<sub>4</sub> and NaOH; (F) relative activity at 45°C.

### 32 3. Optimization and evaluation of experimental conditions

33 The calculation process is as follows:

34 Use the following formula for SA calculation:

$$35 \quad b(\text{nanozyme}) = v / ((\epsilon \cdot l)) \cdot ((\Delta A) / (\Delta t))$$

36 Where  $b(\text{nanozyme})$  represents the catalytic activity of a unit nanozyme which is  
 37 defined as the number of nanozymes catalyzing to produce 1 µmol product per minute  
 38 at 37°C;  $v$  is the total volume of the reaction system (µL);  $\epsilon$  is the path length (cm) of

39 light propagation in the colorimetric plate which is called the molar absorption  
40 coefficient. The molar absorption coefficient of TMB at 652 nm is 39,000 M<sup>-1</sup> cm<sup>-1</sup>  
41 (OPD:  $\epsilon_{417\text{ nm}} = 16700\text{ M}^{-1}\text{ cm}^{-1}$ ; ABTS:  $\epsilon_{420\text{ nm}} = 36000\text{ M}^{-1}\text{ cm}^{-1}$ ) is the path length  
42 (cm) of light propagation in the colorimeter.  $A$  is the absorbance after subtracting the  
43 blank value;  $\Delta A/\Delta t$  is the initial change rate of 652 nm/min absorbance.

$$44 \quad a(\text{nanozyme}) = (b(\text{nanozyme}))/([m])$$

45  $a(\text{nanozyme})$  is SA (U mg<sup>-1</sup>) expressed per milligram nanozyme;  $[m]$  is the weight  
46 of nanozyme (mg) for each test. Due to  $b(\text{nanozyme})$  catalytic activity is linearly related  
47 to its mass, by drawing the relation schema between  $b(\text{nanozyme})$  and  $[m]$ , the slope of  
48 the line is the measured SA value.

49 Use the following formula for  $K_m$ ,  $v_{\text{max}}$  and  $k_{\text{cat}}$  calculation:

$$50 \quad v = (v(\text{max}) \cdot [s]) / (K_m + [s])$$

51  $v$  is the initial reaction rate, and  $v(\text{max})$  is the maximum reaction rate at the  
52 concentration of the saturated matrix,  $[s]$  is the substrate concentration,  $K_m$  defined as  
53 half of the substrate concentration at the maximum rate is the Michaelian constant,  
54 reflecting the affinity of the nanozyme to the substrate.

$$55 \quad k(\text{cat}) = v(\text{max})/[E]$$

56  $k(\text{cat})$  is the rate constant of the maximum number of substrate molecules  
57 transformation.  $[E]$  is the concentration of nanozyme (M).

58 **3. OXD-like activity parameters and comparison of SAzymes**

59

**Table S1** OXD-like activity parameters and comparison of SAzymes

| Category | Species                             | [E] (M)                | $K_m$ (mM) | $v_{max}$ (M s <sup>-1</sup> ) | $k_{cat}$ (s <sup>-1</sup> ) | Stability<br>(Maintain 80% activity) | References |
|----------|-------------------------------------|------------------------|------------|--------------------------------|------------------------------|--------------------------------------|------------|
|          | FeN <sub>5</sub> SA/ CNF            | $5.37 \times 10^{-7}$  | 0.148      | $7.58 \times 10^{-7}$          | 0.708                        | /                                    | 1          |
|          | MnN <sub>5</sub> SA/ CNF            | $1.50 \times 10^{-7}$  | 0.253      | $4 \times 10^{-7}$             | 0.374                        | /                                    | 1          |
|          | CoN <sub>5</sub> SA/ CNF            | $0.31 \times 10^{-7}$  | 0.682      | $1.77 \times 10^{-7}$          | 0.174                        | /                                    | 1          |
|          | FeN <sub>4</sub> SA/ CNF            | $0.19 \times 10^{-8}$  | 0.143      | $4.5 \times 10^{-8}$           | 0.042                        | /                                    | 1          |
|          | NiN <sub>5</sub> SA/ CNF            | $3.6 \times 10^{-13}$  | 0.120      | $6 \times 10^{-10}$            | 0.0006                       | /                                    | 1          |
|          | CuN <sub>5</sub> SA/ CNF            | $2.35 \times 10^{-13}$ | 0.124      | $4.7 \times 10^{-10}$          | 0.0005                       | /                                    | 1          |
|          | Ce-N-C                              | $8.85 \times 10^{-8}$  | 0.199      | $1.14 \times 10^{-8}$          | 0.129                        | 15 h                                 | This work  |
|          | Pt NPs                              | /                      | 0.09       | $7 \times 10^{-6}$             | /                            | 3-4 h                                | 2          |
| SAzymes  | CeO <sub>2</sub>                    | /                      | 3.8        | $7 \times 10^{-5}$             | /                            | /                                    | 3          |
|          | Ag@Ag <sub>3</sub> PO <sub>4</sub>  | /                      | 2.09       | /                              | /                            | 0.06 h                               | 4          |
|          | Pt nanoclusters                     | /                      | 0.63       | $2.7 \times 10^{-6}$           | /                            | 2 h                                  | 5          |
|          | Ir NPs                              | $1.72 \times 10^{-10}$ | 0.28       | $1.37 \times 10^{-7}$          | /                            | /                                    | 6          |
|          | Au@Pt                               | $5.0 \times 10^{-12}$  | 0.013      | $2.5 \times 10^{-10}$          | 500                          | Above 30 min                         | 7          |
|          | NiCo <sub>2</sub> O <sub>4</sub> Ms | 20 μg/ mL              | 0.127      | $9.99 \times 10^{-9}$          | /                            | Above 2h                             | 8          |
|          | MSN-Au NPs                          |                        | 0.2248     | $1.187 \times 10^{-7}$         | /                            | Above 4 months                       | 9          |
|          | FeCo NPs@PNC                        | 2 mg/mL                | 0.091      | $9.39 \times 10^{-8}$          | /                            | /                                    | 10         |

CeVO<sub>4</sub>

0.0985

3.94×10<sup>-8</sup>

/

/

11

60

61 *4. Detection results of Fe<sup>3+</sup> and Cr<sup>6+</sup> in real samples*

62

**Table S2** Detection results of Fe<sup>3+</sup> and Cr<sup>6+</sup>

| metal ion        | Real samples   | The adding standard amount (μg/mL) | The amount of detection (μg/mL) | ICP-MS detection (μg/mL) | Recovery (%) | RSD (% n=3) |
|------------------|----------------|------------------------------------|---------------------------------|--------------------------|--------------|-------------|
| Fe <sup>3+</sup> | Drinking water | 0.5                                | 0.71                            | 0.71                     | 101.43       | 1.43        |
|                  | Tap water      | 0.5                                | 0.72                            | 0.71                     | 113.24       | 2.71        |
|                  | Wheat          | 0.5                                | 0.65                            | 0.66                     | 100.41       | 0.62        |
|                  | Peach          | 0.5                                | 0.66                            | 0.67                     | 103.43       | 1.05        |
|                  | Rose tea       | 0.5                                | 0.64                            | 0.64                     | 88.66        | 0.98        |
|                  | Black tea      | 0.5                                | 0.62                            | 0.63                     | 103.78       | 2.11        |
|                  | Celery         | 0.5                                | 0.65                            | 0.66                     | 101.24       | 1.63        |
|                  | Spinach        | 0.5                                | 0.71                            | 0.72                     | 102.66       | 0.82        |
|                  | Quenelle       | 0.5                                | 0.65                            | 0.68                     | 101.22       | 1.17        |
|                  | Frozen chicken | 0.5                                | 0.62                            | 0.66                     | 95.68        | 2.75        |
| Cr <sup>6+</sup> | Drinking water | 0.5                                | 0.42                            | 0.44                     | 85.49        | 3.01        |
|                  | Tap water      | 0.5                                | 0.44                            | 0.45                     | 89.42        | 2.78        |
|                  | Wheat          | 0.5                                | 0.53                            | 0.53                     | 106.41       | 4.34        |

|                |     |      |      |        |      |
|----------------|-----|------|------|--------|------|
| Peach          | 0.5 | 0.43 | 0.44 | 86.27  | 1.76 |
| Rose tea       | 0.5 | 0.48 | 0.47 | 97.28  | 2.12 |
| Black tea      | 0.5 | 0.45 | 0.46 | 90.89  | 3.43 |
| Celery         | 0.5 | 0.45 | 0.48 | 91.22  | 0.97 |
| Spinach        | 0.5 | 0.55 | 0.57 | 111.22 | 1.13 |
| Quenelle       | 0.5 | 0.42 | 0.45 | 84.61  | 1.59 |
| Frozen chicken | 0.5 | 0.47 | 0.50 | 95.89  | 2.92 |

---

## 64 References

- 65 1 Huang, L.; Chen, J. X.; Gan, L. F.; Wang, J.; Dong, S. J., Single-atom  
66 nanozymes. *Sci Adv* 2019, **5** (5), eaav5490-5498.
- 67 2 You, J. G.; Liu, Y. W.; Lu, C. Y.; Tseng, W. L.; Yu, C. J., Colorimetric assay  
68 of heparin in plasma based on the inhibition of oxidase-like activity of citrate-  
69 capped platinum nanoparticles. *Biosensors and Bioelectronics* 2017, **92**, 442-  
70 448.
- 71 3 Asati, A.; Santra, S.; Kaittanis, C.; Nath, S.; Perez, J. M., Oxidase-like activity  
72 of polymer-coated cerium oxide nanoparticles. *Angew Chem Int Ed Engl* 2009,  
73 **48** (13), 2308-2312.
- 74 4 Chai, D. F.; Ma, Z.; Qiu, Y.; Lv, Y. G.; Liu, H.; Song, C. Y.; Gao, G. G.,  
75 Oxidase-like mimic of Ag@Ag<sub>3</sub>PO<sub>4</sub> microcubes as a smart probe for  
76 ultrasensitive and selective Hg(2+) detection. *Dalton transactions (Cambridge,*  
77 *England: 2003)* 2016, **45** (7), 3048-3054.
- 78 5 Yu, C. J.; Chen, T. H.; Jiang, J. Y.; Tseng, W. L., Lysozyme-directed synthesis  
79 of platinum nanoclusters as a mimic oxidase. *Nanoscale* 2014, **6** (16), 9618-  
80 9624.
- 81 6 Cui, M.; Zhao, Y.; Wang, C.; Song, Q., The oxidase-like activity of iridium  
82 nanoparticles, and their application to colorimetric determination of dissolved  
83 oxygen. *Microchimica Acta* 2017, **184** (9), 3113-3119.
- 84 7 He, W.; Liu, Y.; Yuan, J.; Yin, J. J.; Wu, X.; Hu, X.; Zhang, K.; Liu, J.; Chen,  
85 C.; Ji, Y.; Guo, Y., Au@Pt nanostructures as oxidase and peroxidase mimetics  
86 for use in immunoassays. *Biomaterials* 2011, **32** (4), 1139-1147.
- 87 8 Su, L.; Dong, W.; Wu, C.; Gong, Y.; Zhang, Y.; Li, L.; Mao, G.; Feng, S., The  
88 peroxidase and oxidase-like activity of NiCo(2)O(4) mesoporous spheres:  
89 Mechanistic understanding and colorimetric biosensing. *Anal Chim Acta* 2017,  
90 **951**, 124-132.
- 91 9 Tao, Y.; Ju, E.; Ren, J.; Qu, X., Bifunctionalized mesoporous silica-supported  
92 gold nanoparticles: intrinsic oxidase and peroxidase catalytic activities for  
93 antibacterial applications. *Advanced materials (Deerfield Beach, Fla.)* 2015,  
94 **27** (6), 1097-1104.
- 95 10 Wu, T.; Ma, Z.; Li, P.; Liu, M.; Liu, X.; Li, H.; Zhang, Y.; Yao, S.,  
96 Colorimetric detection of ascorbic acid and alkaline phosphatase activity based  
97 on the novel oxidase mimetic of Fe-Co bimetallic alloy encapsulated porous  
98 carbon nanocages. *Talanta* 2019, **202**, 354-361.
- 99 11 Yang, H., Zha, J., Zhang, P., et al. Fabrication of CeVO<sub>4</sub> as nanozyme for  
100 facile colorimetric discrimination of hydroquinone from resorcinol and  
101 catechol. *Sensors & Actuators B Chemical*, 2017, **247**, 469-478.
